# Supplementary material for: Synchronization of Developmental Processes and Defense Signaling by Growth Regulating Transcription Factors
Source: PLoS One. 2014 May 29;9(5):e98477. doi: 10.1371/journal.pone.0098477 (PMC4038601; doi:10.1371/journal.pone.0098477)
Supplement: Table S5 — Biological pathway description of 383 putative targets of GRF1 or GRF3. (XLSX) [file pone.0098477.s005.xlsx]

## Sheet: Table S5
Table S5. Biological pathway description of 383 putative targets of GRF1 or GRF3.
Gene ID	Putative target of	Pathway
AT1G01360	GRF1	Plant hormone signal transduction (ath04075)
AT1G02640	GRF1	Cyanoamino acid metabolism (ath00460)	Phenylpropanoid biosynthesis (ath00940)	Starch and sucrose metabolism (ath00500)
AT1G02850	GRF3	Cyanoamino acid metabolism (ath00460)	Phenylpropanoid biosynthesis (ath00940)	Starch and sucrose metabolism (ath00500)
AT1G03600	GRF1	Photosynthesis (ath00195)
AT1G03905	GRF1	Seed Development (WP2279)
AT1G04610	GRF3	Tryptophan metabolism (ath00380)
AT1G04980	GRF3	Protein processing in endoplasmic reticulum (ath04141)
AT1G06000	GRF1	kaempferol glucoside biosynthesis (Arabidopsis) (ARA_PWY-5320)	quercetin glucoside biosynthesis (Arabidopsis) (ARA_PWY-5321)	superpathway of flavones and derivatives biosynthesis (ARA_PWY-6266-ARA)
AT1G06550	GRF1	beta-Alanine metabolism (ath00410)	Propanoate metabolism (ath00640)	Valine, leucine and isoleucine degradation (ath00280)
AT1G06570	GRF3	Phenylalanine metabolism (ath00360)	Tyrosine metabolism (ath00350)	Ubiquinone and other terpenoid-quinone biosynthesis (ath00130)
AT1G06680	GRF1	Photosynthesis (ath00195)
AT1G06720	GRF1	Ribosome biogenesis in eukaryotes (ath03008)
AT1G07070	GRF1+GRF3	Ribosome/Ribosome, eukaryotes (ath03010)
AT1G08510	GRF1	Fatty acid biosynthesis (ath00061)
AT1G08520	GRF1	Porphyrin and chlorophyll metabolism (ath00860)
AT1G09240	GRF3	Seed Development (WP2280)
AT1G09620	GRF1	Aminoacyl-tRNA biosynthesis (ath00970)
AT1G10360	GRF3	Glutathione metabolism (ath00480)
AT1G10370	GRF1+GRF3	Glutathione metabolism (ath00480)
AT1G10490	GRF1	Ribosome biogenesis in eukaryotes (aly03008)
AT1G12900	GRF1	Carbon fixation in photosynthetic organisms (ath00710)	Carbon metabolism (ath01200)	Reductive pentose phosphate cycle (Calvin cycle) (ath_M00165)	Reductive pentose phosphate cycle, ribulose-5P => glyceraldehyde-3P ( ath_M00166)
AT1G12940	GRF1	Nitrogen metabolism (ath00910)
AT1G13100	GRF3	Limonene and pinene degradation (ath00903)
AT1G13280	GRF1	alpha-Linolenic acid metabolism (ath00592)	Jasmonic acid biosynthesis (ath_M00113)
AT1G14710	GRF1+GRF3	Seed Development (WP2280)
AT1G14810	GRF1+GRF3	2-Oxocarboxylic acid metabolism (ath01210)	Biosynthesis of amino acids (ath01230)	Cysteine and methionine metabolism (ath00270)	Glycine, serine and threonine metabolism (ath00260)	Lysine biosynthesis (ath00300)	Lysine biosynthesis, DAP aminotransferase pathway, aspartate => lysine (ath_M00527)	Threonine biosynthesis, aspartate => homoserine => threonine (ath_M00018)
AT1G15440	GRF1	Ribosome biogenesis in eukaryotes (ath03008)
AT1G15550	GRF1	Diterpenoid biosynthesis (ath00904)
AT1G15820	GRF1	Photosynthesis - antenna proteins (ath00196)
AT1G15930	GRF1+GRF3	Ribosome/Ribosome, eukaryotes (ath03010)
AT1G15950	GRF1	Lignin biosynthesis, cinnamate => lignin (ath_M00039)	Phenylpropanoid biosynthesis (ath00940)
AT1G16920	GRF3	Endocytosis (ath04144)
AT1G17180	GRF1	Glutathione metabolism (ath00480)
AT1G17590	GRF3	Flowering Time Pathway (WP2312)
AT1G17745	GRF1+GRF3	Biosynthesis of amino acids (ath01230)	Carbon metabolism (ath01200)	Glycine, serine and threonine metabolism (ath00260)	Serine biosynthesis, glycerate-3P => serine (ath_M00020)
AT1G21440	GRF1	Seed Development (WP2280)
AT1G22070	GRF1	Plant hormone signal transduction (ath04075)
AT1G22410	GRF1+GRF3	Biosynthesis of amino acids (ath01230)	Phenylalanine, tyrosine and tryptophan biosynthesis (ath00400)	Seed Development (WP2280)	Shikimate pathway, phosphoenolpyruvate + erythrose-4P => chorismate (ath_M00022)
AT1G22430	GRF1	Carbon metabolism (ath01200)	Degradation of aromatic compounds (ath01220)	Fatty acid degradation (ath00071)	Glycolysis / Gluconeogenesis (ath00010)	Tyrosine metabolism (ath00350)
AT1G23410	GRF3	Ribosome/Ribosome, eukaryotes (ath03010)
AT1G23730	GRF1	Nitrogen metabolism (ath00910)
AT1G23750	GRF1	DNA replication (ath03030)	Homologous recombination (ath03440)	Mismatch repair (ath03430)	Nucleotide excision repair (ath03420)	RPA complex (ath_M00288)
AT1G24280	GRF1+GRF3	Carbon metabolism (ath01200)	Glutathione metabolism (ath00480)	Pentose phosphate pathway (ath00030)	Pentose phosphate pathway (Pentose phosphate cycle) (ath_M00004)	Pentose phosphate pathway, oxidative phase, glucose 6P => ribulose 5P (ath_M00006)
AT1G24735	GRF1	Capsaicin biosynthesis, L-Phenylalanine => Capsaicin (ath_M00350)	Flavonoid biosynthesis (ath00941)	Phenylalanine metabolism (ath00360)	Phenylpropanoid biosynthesis (ath00940)	Stilbenoid, diarylheptanoid and gingerol biosynthesis (ath00945)
AT1G27140	GRF1	Glutathione metabolism (ath00480)
AT1G27400	GRF1+GRF3	Ribosome/Ribosome, eukaryotes (ath03010)
AT1G28130	GRF3	Plant hormone signal transduction (ath04075)
AT1G29900	GRF1	Alanine, aspartate and glutamate metabolism (ath00250)	Pyrimidine metabolism (ath00240)
AT1G30380	GRF1	Photosynthesis (ath00195)	Seed Development (WP2280)
AT1G30510	GRF1	Photosynthesis (ath00195)
AT1G31070	GRF1	Amino sugar and nucleotide sugar metabolism (ath00520)
AT1G31230	GRF1+GRF3	Biosynthesis of amino acids (ath01230)	Cysteine and methionine metabolism (ath00270)	Glycine, serine and threonine metabolism ( ath00260)	Lysine biosynthesis (ath00300)	Lysine biosynthesis, DAP aminotransferase pathway, aspartate => lysine (ath_M00527)	Threonine biosynthesis, aspartate => homoserine => threonine (ath_M00018)
AT1G31330	GRF1	Photosynthesis (aly00195)	Photosynthesis (ath00195)	Photosystem I (aly_M00163)	Photosystem I (ath_M00163)
AT1G32990	GRF1	Ribosome/Ribosome, eukaryotes (ath03010)
AT1G33260	GRF1	Seed Development (WP2280)
AT1G35680	GRF1	Ribosome/Ribosome, eukaryotes (ath03010)
AT1G35910	GRF1	Starch and sucrose metabolism (ath00500)
AT1G42970	GRF1	Carbon fixation in photosynthetic organisms (ath00710)	Carbon metabolism (ath01200)	Reductive pentose phosphate cycle (Calvin cycle) (ath_M00165)	Reductive pentose phosphate cycle, ribulose-5P => glyceraldehyde-3P ( ath_M00166)
AT1G43710	GRF1+GRF3	Histidine metabolism (ath00340)
AT1G44318	GRF1	Porphyrin and chlorophyll metabolism (ath00860)
AT1G48350	GRF1	Ribosome/Ribosome, eukaryotes (ath03010)
AT1G49860	GRF1+GRF3	Glutathione metabolism (ath00480)
AT1G51680	GRF1	Capsaicin biosynthesis, L-Phenylalanine => Capsaicin (ath_M00350)	Lignin biosynthesis, cinnamate => lignin (ath_M00039)	Ubiquinone and other terpenoid-quinone biosynthesis (ath00130)
AT1G51950	GRF1+GRF3	Plant hormone signal transduction (ath04075)
AT1G52230	GRF1	Photosynthesis (ath00195)
AT1G53680	GRF1	Glutathione metabolism (ath00480)
AT1G54340	GRF1	2-Oxocarboxylic acid metabolism (ath01210)	Biosynthesis of amino acids (ath01230)	Carbon metabolism (ath01200)	Citrate cycle (TCA cycle) (ath00020)	Citrate cycle, first carbon oxidation, oxaloacetate => 2-oxoglutarate (ath_M00010)	Glutathione metabolism (ath00480)	Peroxisome (ath04146)
AT1G55490	GRF1	RNA degradation (ath03018)
AT1G55670	GRF1	Photosynthesis (ath00195)
AT1G55760	GRF1	Cul3-SPOP complex (ath_M00384)
AT1G55810	GRF1	Pyrimidine metabolism (ath00240)
AT1G56340	GRF1+GRF3	Phagosome (ath04145)	Protein processing in endoplasmic reticulum (ath04141)
AT1G58080	GRF1	Biosynthesis of amino acids (ath01230)	histidine biosynthesis (ARA_HISTSYN-PWY)	Histidine metabolism (ath00340)
AT1G59760	GRF1	RNA degradation (ath03018)
AT1G59940	GRF3	Plant hormone signal transduction (ath04075)
AT1G60140	GRF1	Starch and sucrose metabolism (ath00500)
AT1G62380	GRF1+GRF3	Cysteine and methionine metabolism (ath00270)	Ethylene biosynthesis, methionine => ethylene (ath_M00368)
AT1G63800	GRF1	Ubiquitin mediated proteolysis (ath04120)
AT1G63940	GRF1	Ascorbate and aldarate metabolism (ath00053)
AT1G64190	GRF1+GRF3	Carbon metabolism (ath01200)	Glutathione metabolism (ath00480)	Pentose phosphate pathway (ath00030)	Pentose phosphate pathway (Pentose phosphate cycle) (ath_M00004)	Pentose phosphate pathway, oxidative phase, glucose 6P => ribulose 5P (ath_M00006)
AT1G64970	GRF3	Tocopherol biosynthesis (ath_M00112)	Ubiquinone and other terpenoid-quinone biosynthesis (ath00130)
AT1G66400	GRF1	Plant-pathogen interaction (ath04626)
AT1G66430	GRF1	Amino sugar and nucleotide sugar metabolism (ath00520)	Fructose and mannose metabolism (ath00051)	Starch and sucrose metabolism (ath00500)
AT1G67110	GRF1	Zeatin biosynthesis (ath00908)
AT1G67120	GRF1	Ribosome biogenesis in eukaryotes (ath03008)
AT1G67880	GRF1	N-Glycan biosynthesis (ath00510)
AT1G69370	GRF1	Biosynthesis of amino acids (ath01230)	Phenylalanine, tyrosine and tryptophan biosynthesis (ath00400)
AT1G72810	GRF1	Biosynthesis of amino acids (ath01230)	Glycine, serine and threonine metabolism (ath00260)	Threonine biosynthesis, aspartate => homoserine => threonine (ath_M00018)	Vitamin B6 metabolism (ath00750)
AT1G72830	GRF1+GRF3	Flowering Time Pathway (WP2312)
AT1G74010	GRF1	Indole alkaloid biosynthesis (ath00901)
AT1G74090	GRF1	Glucosinolate biosynthesis (ath00966)
AT1G74260	GRF1	Purine metabolism (ath00230)
AT1G74470	GRF1	chlorophyll a biosynthesis II (ARA_PWY-5064)	phytyl diphosphate biosynthesis (ARA_PWY-5063)	Porphyrin and chlorophyll metabolism (ath00860)	superpathway of phylloquinol biosynthesis (ARA_PWY-5863)	Terpenoid backbone biosynthesis (ath00900)
AT1G74590	GRF3	Glutathione metabolism (ath00480)
AT1G74970	GRF1	Ribosome/Ribosome, eukaryotes (ath03010)
AT1G76040	GRF3	Plant-pathogen interaction (ath04626)
AT1G76100	GRF3	Photosynthesis (ath00195)
AT1G76730	GRF1	One carbon pool by folate (ath00670)
AT1G77060	GRF1	Seed Development (WP2280)
AT1G77120	GRF1	Degradation of aromatic compounds (ath01220)	ethanol degradation IV (ARA_PWY66-162)	Fatty acid degradation (ath00071)	Glycolysis / Gluconeogenesis (ath00010)	Tyrosine metabolism (ath00350)
AT1G77490	GRF1	Ascorbate and aldarate metabolism (ath00053)	Glutathione metabolism (ath00480)
AT1G77760	GRF1	Assimilatory nitrate reduction, nitrate => ammonia (ath_M00531)
AT1G77920	GRF1	Plant hormone signal transduction (ath04075)
AT1G78050	GRF1	Biosynthesis of amino acids (ath01230)	Carbon metabolism (ath01200)	Gluconeogenesis, oxaloacetate => fructose-6P (ath_M00003)	Glycine, serine and threonine metabolism (ath00260)	Glycolysis (Embden-Meyerhof pathway), glucose => pyruvate (ath_M00001)	Glycolysis / Gluconeogenesis (ath00010)	Glycolysis, core module involving three-carbon compounds (ath_M00003)
AT1G78090	GRF1	Starch and sucrose metabolism (ath00500)
AT1G78340	GRF1+GRF3	Glutathione metabolism (ath00480)
AT1G78370	GRF1	Glutathione metabolism (ath00480)
AT1G78950	GRF1	Sesquiterpenoid and triterpenoid biosynthesis (ath00909)
AT1G79470	GRF1	Guanine ribonucleotide biosynthesis IMP => GDP,GTP (ath_M00050)	Purine metabolism (ath00230)
AT1G79850	GRF1	Ribosome/Ribosome, eukaryotes (ath03010)
AT1G80050	GRF1	Purine metabolism (ath00230)
AT1G80100	GRF1	Plant hormone signal transduction (ath04075)
AT1G80780	GRF1	RNA degradation (ath03018)
AT2G04030	GRF1	Plant-pathogen interaction (ath04626)	Protein processing in endoplasmic reticulum (ath04141)
AT2G06530	GRF1	Endocytosis (ath04144)	ESCRT-III complex (ath_M00412)
AT2G06925	GRF3	Linoleic acid metabolism (ath00591)
AT2G14210	GRF1+GRF3	Seed Development (WP2280)
AT2G15620	GRF1	Assimilatory nitrate reduction, nitrate => ammonia (ath_M00531)	Nitrogen metabolism (ath00910)
AT2G16440	GRF1+GRF3	DNA replication (ath03030)	MCM complex (ath_M00285)
AT2G18400	GRF3	Ribosome/Ribosome, eukaryotes (ath03010)
AT2G19900	GRF1+GRF3	C4-dicarboxylic acid cycle, NADP - malic enzyme type (ath_M00172)	CAM (Crassulacean acid metabolism), light (ath_M00169)	Carbon fixation in photosynthetic organisms (ath00710)	Carbon metabolism (ath01200)	Pyruvate metabolism (ath00620)
AT2G20340	GRF3	Isoquinoline alkaloid biosynthesis (ath00950)	Tyrosine metabolism (ath00350)
AT2G20490	GRF1	H/ACA ribonucleoprotein complex (ath_M00425)	Ribosome biogenesis in eukaryotes (ath03008)
AT2G21045	GRF3	Ribosome/Ribosome, eukaryotes (ath03010)
AT2G21210	GRF1	Plant hormone signal transduction (ath04075)
AT2G21440	GRF1	Ribosome biogenesis in eukaryotes (ath03008)
AT2G22240	GRF1+GRF3	Inositol phosphate metabolism (ath00562)
AT2G23170	GRF1	Plant hormone signal transduction (ath04075)
AT2G24400	GRF3	Plant hormone signal transduction (ath04075)
AT2G25210	GRF3	Ribosome/Ribosome, eukaryotes (ath03010)
AT2G26040	GRF3	Plant hormone signal transduction (ath04075)
AT2G28260	GRF3	Plant-pathogen interaction (ath04626)
AT2G28440	GRF1	Seed Development (WP2280)
AT2G29460	GRF1+GRF3	Glutathione metabolism (ath00480)
AT2G29480	GRF3	Glutathione metabolism (ath00480)
AT2G29990	GRF1	Oxidative phosphorylation (ath00190)
AT2G30260	GRF1	Spliceosome (ath03040)	Spliceosome, U2-snRNP (ath_M00352)
AT2G30490	GRF1	Capsaicin biosynthesis, L-Phenylalanine => Capsaicin (ath_M00350)	Degradation of aromatic compounds (ath01220)	Flavonoid biosynthesis (ath00941)	Lignin biosynthesis, cinnamate => lignin (ath_M00039)	Phenylalanine metabolism (ath00360)	Phenylpropanoid biosynthesis (ath00940)	Stilbenoid, diarylheptanoid and gingerol biosynthesis (ath00945)
AT2G30570	GRF1	Photosynthesis (ath00195)
AT2G31320	GRF3	Biosynthesis of unsaturated fatty acids (ath01040)
AT2G33210	GRF1+GRF3	RNA degradation ( ath03018)
AT2G33800	GRF1	Ribosome/Ribosome, eukaryotes (ath03010)
AT2G35920	GRF1	RNA degradation (ath03018)
AT2G36620	GRF3	Ribosome/Ribosome, eukaryotes (ath03010)
AT2G36950	GRF1	Seed Development (WP2280)
AT2G37040	GRF1	Capsaicin biosynthesis, L-Phenylalanine => Capsaicin (ath_M00350)	Phenylalanine metabolism (ath00360)	Phenylpropanoid biosynthesis (ath00940)
AT2G38470	GRF1+GRF3	Plant-pathogen interaction (ath04626)
AT2G40100	GRF1+GRF3	Photosynthesis - antenna proteins (ath00196)
AT2G40330	GRF3	Plant hormone signal transduction (ath04075)
AT2G40650	GRF1	Spliceosome (ath03040)
AT2G40890	GRF1	Flavonoid biosynthesis (ath00941)	Phenylpropanoid biosynthesis (ath00940)	Stilbenoid, diarylheptanoid and gingerol biosynthesis (ath00945)
AT2G41370	GRF1	Plant hormone signal transduction (ath04075)
AT2G41410	GRF1+GRF3	Plant-pathogen interaction (ath04626)
AT2G41530	GRF1	Carbon metabolism (ath01200)
AT2G42740	GRF1	Ribosome/Ribosome, eukaryotes (ath03010)
AT2G43100	GRF1	2-Oxocarboxylic acid metabolism (ath01210)	Biosynthesis of amino acids (ath01230)	C5-Branched dibasic acid metabolism (ath00660)	Leucine biosynthesis, 2-oxoisovalerate => 2-oxoisocaproate (ath_M00432)	Valine, leucine and isoleucine biosynthesis (ath00290)
AT2G43590	GRF1	Amino sugar and nucleotide sugar metabolism (ath00520)
AT2G43750	GRF1	Biosynthesis of amino acids (ath01230)	Carbon metabolism (ath01200)	Cysteine and methionine metabolism (ath00270)	Cysteine biosynthesis, serine => cysteine (ath_M00021)	Sulfur metabolism (ath00920)
AT2G43820	GRF3	Seed Development (WP2280)
AT2G44120	GRF1+GRF3	Ribosome/Ribosome, eukaryotes (ath03010)
AT2G44450	GRF1	Cyanoamino acid metabolism (ath00460)	Phenylpropanoid biosynthesis (ath00940)	Starch and sucrose metabolism (ath00500)
AT2G44460	GRF1	Cyanoamino acid metabolism (ath00460)	Phenylpropanoid biosynthesis (ath00940)	Starch and sucrose metabolism (ath00500)
AT2G44860	GRF3	Ribosome/Ribosome, eukaryotes (ath03010)
AT2G46030	GRF1	Ubiquitin mediated proteolysis (ath04120)
AT2G46860	GRF1	Oxidative phosphorylation (ath00190)
AT2G47000	GRF1+GRF3	ABC transporters ( ath02010)
AT3G01120	GRF1	Biosynthesis of amino acids (ath01230)	Cysteine and methionine metabolism (ath00270)	seleno-amino acid biosynthesis (ARA_PWY-6936)	Selenocompound metabolism (ath00450)	Sulfur metabolism (ath00920)
AT3G01260	GRF1	Glycolysis / Gluconeogenesis (ath00010)
AT3G01420	GRF3	alpha-Linolenic acid metabolism (ath00592)
AT3G02080	GRF3	Ribosome/Ribosome, eukaryotes (ath03010)
AT3G03190	GRF1	Glutathione metabolism (ath00480)
AT3G03670	GRF3	Lignin biosynthesis, cinnamate => lignin (ath_M00039)	Phenylalanine metabolism (ath00360)	Phenylpropanoid biosynthesis (ath00940)
AT3G03910	GRF1	Alanine, aspartate and glutamate metabolism (ath00250)	Arginine and proline metabolism (ath00330)	Nitrogen metabolism (ath00910)
AT3G03920	GRF1	H/ACA ribonucleoprotein complex (ath_M00425)	Ribosome biogenesis in eukaryotes (ath03008)
AT3G03980	GRF3	Biosynthesis of unsaturated fatty acids (ath01040)	Biotin metabolism (ath00780)	Fatty acid biosynthesis (ath00061)	Fatty acid biosynthesis, elongation (ath_M00083)
AT3G04230	GRF1+GRF3	Ribosome/Ribosome, eukaryotes (ath03010)
AT3G05060	GRF1	Ribosome biogenesis in eukaryotes (ath03008)
AT3G05630	GRF1	Endocytosis (ath04144)	Ether lipid metabolism (ath00565)	Glycerophospholipid metabolism (ath00564)
AT3G05690	GRF1+GRF3	Flowering Time Pathway (WP2312)
AT3G06530	GRF1	Ribosome biogenesis in eukaryotes (ath03008)
AT3G06680	GRF3	Ribosome/Ribosome, eukaryotes (ath03010)
AT3G07050	GRF1	Ribosome biogenesis in eukaryotes (ath03008)
AT3G07270	GRF3	Folate biosynthesis (ath00790)	Tetrahydrofolate biosynthesis, GTP => THF (ath_M00126)
AT3G08690	GRF3	Protein processing in endoplasmic reticulum (ath04141)	Ubiquitin mediated proteolysis (ath04120)
AT3G08700	GRF3	Protein processing in endoplasmic reticulum (ath04141)	Ubiquitin mediated proteolysis (ath04120)
AT3G08860	GRF1	Alanine, aspartate and glutamate metabolism (ath00250)	Glycine, serine and threonine metabolism (ath00260)
AT3G09270	GRF3	Glutathione metabolism (ath00480)
AT3G09630	GRF1	Ribosome/Ribosome, eukaryotes (ath03010)
AT3G09940	GRF3	Ascorbate and aldarate metabolism (ath00053)
AT3G11410	GRF3	Plant hormone signal transduction (ath04075)
AT3G12780	GRF1	Biosynthesis of amino acids (ath01230)	Carbon fixation in photosynthetic organisms (ath00710)	Carbon metabolism (ath01200)	Gluconeogenesis, oxaloacetate => fructose-6P (ath_M00003)	Glycolysis (Embden-Meyerhof pathway), glucose => pyruvate (ath_M00001)	Glycolysis / Gluconeogenesis (ath00010)	Glycolysis, core module involving three-carbon compounds (ath_M00002)
AT3G12830	GRF1	Plant hormone signal transduction (ath04075)
AT3G13470	GRF1	RNA degradation (ath03018)
AT3G13860	GRF3	RNA degradation (ath03018)
AT3G16310	GRF1+GRF3	RNA transport (ath03013)
AT3G16780	GRF1+GRF3	Ribosome/Ribosome, eukaryotes (ath03010)
AT3G18080	GRF1	Cyanoamino acid metabolism (ath00460)	Phenylpropanoid biosynthesis (ath00940)	Starch and sucrose metabolism (ath00500)
AT3G18130	GRF1	Seed Development (WP2280)
AT3G19450	GRF1	Lignin biosynthesis, cinnamate => lignin (ath_M00039)	Phenylpropanoid biosynthesis (ath00940)
AT3G19710	GRF1	2-Oxocarboxylic acid metabolism (ath01210)	Biosynthesis of amino acids (ath01230)	Glucosinolate biosynthesis (ath00966)	Leucine degradation, leucine => acetoacetate + acetyl-CoA (ath_M00036)	Pantothenate and CoA biosynthesis (ath00770)	Valine, leucine and isoleucine biosynthesis (ath00290)	Valine, leucine and isoleucine degradation (ath00280)
AT3G20330	GRF1	Alanine, aspartate and glutamate metabolism (ath00250)	Pyrimidine metabolism (ath00240)
AT3G20910	GRF1	Flowering Time Pathway (WP2312)
AT3G21230	GRF1	Capsaicin biosynthesis, L-Phenylalanine => Capsaicin (ath_M00350)	Lignin biosynthesis, cinnamate => lignin (ath_M00039)	Phenylalanine metabolism (ath00360)	Phenylpropanoid biosynthesis (ath00940)	Ubiquinone and other terpenoid-quinone biosynthesis (ath00130)
AT3G21240	GRF1	Capsaicin biosynthesis, L-Phenylalanine => Capsaicin (ath_M00350)	Lignin biosynthesis, cinnamate => lignin (ath_M00039)	Phenylalanine metabolism (ath00360)	Phenylpropanoid biosynthesis (ath00940)	Ubiquinone and other terpenoid-quinone biosynthesis (ath00130)
AT3G21300	GRF1	Histidine metabolism (ath00340)	Tyrosine metabolism (ath00350)
AT3G21540	GRF1	Ribosome biogenesis in eukaryotes (ath03008)
AT3G21720	GRF1	Carbon metabolism (ath01200)	Glyoxylate and dicarboxylate metabolism (ath00630)	Glyoxylate cycle (ath_M00012)	Seed Development (WP2280)
AT3G22200	GRF3	4-aminobutyrate degradation IV (ARA_PWY-6473)	Alanine, aspartate and glutamate metabolism (ath00250)	Butanoate metabolism (ath00650)	GABA (gamma-Aminobutyrate) shunt (ath_M00027)
AT3G22930	GRF1	Plant-pathogen interaction (ath04626)
AT3G23820	GRF1	Amino sugar and nucleotide sugar metabolism (ath00520)	Starch and sucrose metabolism (ath00500)
AT3G23920	GRF1	Seed Development (WP2280)	Starch and sucrose metabolism (ath00500)
AT3G23940	GRF1+GRF3	2-Oxocarboxylic acid metabolism (ath01210)	Biosynthesis of amino acids (ath01230)	Isoleucine biosynthesis, threonine => 2-oxobutanoate => isoleucine (ath_M00570)	Pantothenate and CoA biosynthesis (ath00770)	Valine, leucine and isoleucine biosynthesis (ath00290)	Valine/isoleucine biosynthesis, pyruvate => valine / 2-oxobutanoate => isoleucine (ath_M00019)
AT3G23990	GRF1+GRF3	RNA degradation (ath03018)
AT3G25860	GRF3	acetyl-CoA biosynthesis I (pyruvate dehydrogenase complex) ( ARA_PYRUVDEHYD-PWY)
AT3G25920	GRF1	Ribosome/Ribosome, eukaryotes (ath03010)
AT3G26650	GRF1	Carbon fixation in photosynthetic organisms (ath00710)	Carbon metabolism (ath01200)	Reductive pentose phosphate cycle (Calvin cycle) (ath_M00165)	Reductive pentose phosphate cycle, ribulose-5P => glyceraldehyde-3P (ath_M00166)
AT3G26720	GRF1	Other glycan degradation (ath00511)
AT3G26830	GRF1+GRF3	Limonene and pinene degradation (ath00903)	Stilbenoid, diarylheptanoid and gingerol biosynthesis (ath00945)
AT3G28900	GRF3	Ribosome/Ribosome, eukaryotes (ath03010)
AT3G29200	GRF1	Biosynthesis of amino acids (ath01230)	Phenylalanine, tyrosine and tryptophan biosynthesis (ath00400)
AT3G29320	GRF1	Seed Development (WP2280)	Starch and sucrose metabolism (ath00500)
AT3G30775	GRF3	Arginine and proline metabolism (ath00330)
AT3G32040	GRF1	Terpenoid backbone biosynthesis (ath00900)
AT3G42640	GRF1	Oxidative phosphorylation (ath00190)
AT3G43190	GRF1	Starch and sucrose metabolism (ath00500)
AT3G44540	GRF1	Cutin, suberine and wax biosynthesis (ath00073)	Peroxisome (ath04146)
AT3G44590	GRF3	Ribosome/Ribosome, eukaryotes (ath03010)
AT3G45640	GRF1	Plant-pathogen interaction (ath04626)
AT3G46960	GRF1	RNA degradation (ath03018)	Ski complex (ath_M00392)
AT3G48170	GRF1	Glycine, serine and threonine metabolism (ath00260)
AT3G48560	GRF1	2-Oxocarboxylic acid metabolism (ath01210)	Biosynthesis of amino acids (ath01230)	Butanoate metabolism (ath00650)	C5-Branched dibasic acid metabolism (ath00660)	Isoleucine biosynthesis, threonine => 2-oxobutanoate => isoleucine (ath_M00570)	Pantothenate and CoA biosynthesis (ath00770)	Valine, leucine and isoleucine biosynthesis (ath00290)
AT3G49190	GRF3	Seed Development (WP2280)
AT3G49960	GRF1	Lignin biosynthesis, cinnamate => lignin (ath_M00039)	Phenylalanine metabolism ( ath00360)	Phenylpropanoid biosynthesis (ath00940)	Brassinosteroid biosynthesis (ath00905)	Castasterone biosynthesis, campesterol => castasterone (ath_M00371)
AT3G50740	GRF3	Lignin biosynthesis, cinnamate => lignin (ath_M00039)	Phenylalanine metabolism (ath00360)	Phenylpropanoid biosynthesis (ath00940)	Phenylpropanoid biosynthesis (ath00940)
AT3G54210	GRF1	Ribosome/Ribosome, eukaryotes (ath03010)
AT3G54990	GRF3	Flowering Time Pathway (WP2312)
AT3G55120	GRF1+GRF3	Flavonoid biosynthesis (ath00941)
AT3G55170	GRF3	Ribosome/Ribosome, eukaryotes (ath03010)
AT3G55940	GRF1	Inositol phosphate metabolism (ath00562)	Seed Development (WP2280)
AT3G56940	GRF1	Porphyrin and chlorophyll metabolism (ath00860)							Reductive pentose phosphate cycle (Calvin cycle) (ath_M00165)	Reductive pentose phosphate cycle, ribulose-5P => glyceraldehyde-3P (ath_M00166)
AT3G57040	GRF1	Plant hormone signal transduction (ath04075)
AT3G57150	GRF1	H/ACA ribonucleoprotein complex (ath_M00425)	Ribosome biogenesis in eukaryotes (ath03008)
AT3G58610	GRF1	2-Oxocarboxylic acid metabolism (ath01210)	Biosynthesis of amino acids (ath01230)	Isoleucine biosynthesis, threonine => 2-oxobutanoate => isoleucine (ath_M00570)	Pantothenate and CoA biosynthesis (ath00770)	Valine, leucine and isoleucine biosynthesis (ath00290)	Valine/isoleucine biosynthesis, pyruvate => valine / 2-oxobutanoate => isoleucine (ath_M00019)
AT3G58700	GRF1	Ribosome/Ribosome, eukaryotes (ath03010)
AT3G58990	GRF1	2-Oxocarboxylic acid metabolism (ath01210)	Biosynthesis of amino acids (ath01230)	C5-Branched dibasic acid metabolism (ath00660)	Leucine biosynthesis, 2-oxoisovalerate => 2-oxoisocaproate (ath_M00432)	Valine, leucine and isoleucine biosynthesis (ath00290)
AT3G60750	GRF1	Biosynthesis of amino acids (ath01230)	Carbon fixation in photosynthetic organisms (ath00710)	Carbon metabolism (ath01200)	Pentose phosphate pathway (ath00030)	Pentose phosphate pathway (Pentose phosphate cycle) (ath_M00004)	Pentose phosphate pathway, non-oxidative phase, fructose 6P => ribose 5P (ath_M00007)	Reductive pentose phosphate cycle (Calvin cycle) (ath_M00165)
AT3G62760	GRF1+GRF3	Glutathione metabolism (ath00480)
AT3G63110	GRF1	Zeatin biosynthesis (ath00908)
AT4G00400	GRF3	Glycerolipid metabolism (ath00561)	Glycerophospholipid metabolism (ath00564)	Triacylglycerol Biosynthesis (WP627)
AT4G01310	GRF1	Ribosome/Ribosome, eukaryotes (ath03010)
AT4G02060	GRF1+GRF3	DNA replication (ath03030)	MCM complex (ath_M00285)
AT4G02280	GRF3	Seed Development (WP2280)	Starch and sucrose metabolism (ath00500)
AT4G02770	GRF1	Photosynthesis (ath00195)	Photosystem I (ath_M00163)	Seed Development (WP2280)
AT4G03330	GRF1	SNARE interactions in vesicular transport (ath04130)
AT4G04940	GRF1	Ribosome biogenesis in eukaryotes (ath03008)
AT4G04955	GRF1	Purine metabolism (ath00230)
AT4G05020	GRF1	Oxidative phosphorylation (ath00190)
AT4G05390	GRF1	Photosynthesis (ath00195)
AT4G09010	GRF1	Ascorbate and aldarate metabolism (ath00053)	Glutathione metabolism (ath00480)
AT4G10040	GRF1	Sulfur metabolism (ath00920)	Sulfur metabolism (fve00920)						Valine/isoleucine biosynthesis, pyruvate => valine / 2-oxobutanoate => isoleucine (ath_M00019)	Valine/isoleucine biosynthesis, pyruvate => valine / 2-oxobutanoate => isoleucine (ath_M00019)
AT4G10340	GRF1	Photosynthesis - antenna proteins (ath00196)	Proteasome (ath03050)	Proteasome, 19S regulatory particle (PA700) (ath_M00341)
AT4G10450	GRF1	Ribosome/Ribosome, eukaryotes (ath03010)
AT4G12600	GRF1+GRF3	Ribosome biogenesis in eukaryotes (ath03008)	Spliceosome (ath03040)	Spliceosome, U4/U6.U5 tri-snRNP (ath_M00354)
AT4G13430	GRF1	2-Oxocarboxylic acid metabolism (ath01210)	Biosynthesis of amino acids (ath01230)	C5-Branched dibasic acid metabolism (ath00660)	Leucine biosynthesis, 2-oxoisovalerate => 2-oxoisocaproate (ath_M00432)	Valine, leucine and isoleucine biosynthesis (ath00290)
AT4G13770	GRF1	2-Oxocarboxylic acid metabolism (ath01210)	Glucosinolate biosynthesis (ath00966)
AT4G14780	GRF3	Stilbenoid, diarylheptanoid and gingerol biosynthesis (ath00945)
AT4G14890	GRF1	Photosynthesis (ath00195)
AT4G14930	GRF1	Nicotinate and nicotinamide metabolism (ath00760)	Purine metabolism (ath00230)	Pyrimidine metabolism (ath00240)
AT4G18360	GRF1+GRF3	Glyoxylate and dicarboxylate metabolism (ath00630)	Peroxisome (ath04146)	Photorespiration (ath_M00532)
AT4G19200	GRF1	Seed Development (WP2280)
AT4G20360	GRF1	Plant-pathogen interaction (ath04626)
AT4G20440	GRF3	Sm core complex (ath_M00398)	Spliceosome (ath03040)	Spliceosome, 35S U5-snRNP (ath_M00355)	Spliceosome, U1-snRNP (ath_M00351)	Spliceosome, U2-snRNP (ath_M00352)	Spliceosome, U4/U6.U5 tri-snRNP (ath_M00354)
AT4G21280	GRF1	Photosynthesis (ath00195)
AT4G21990	GRF1	Sulfur metabolism (ath00920)
AT4G22110	GRF1	Carbon metabolism (ath01200)	Degradation of aromatic compounds (ath01220)	Fatty acid degradation (ath00071)	Glycolysis / Gluconeogenesis (ath00010)	Tyrosine metabolism (ath00350)
AT4G23920	GRF1	Amino sugar and nucleotide sugar metabolism (ath00520)	Galactose metabolism (ath00052)
AT4G24280	GRF1	Endocytosis (ath04144)	Protein processing in endoplasmic reticulum (ath04141)	Spliceosome (ath03040)	Spliceosome, 35S U5-snRNP (ath_M00355)	Spliceosome, Prp19/CDC5L complex (ath_M00353)
AT4G24830	GRF1+GRF3	Alanine, aspartate and glutamate metabolism (ath00250)	Arginine and proline metabolism (ath00330)	Biosynthesis of amino acids (ath01230)
AT4G25630	GRF1+GRF3	Ribosome biogenesis in eukaryotes (ath03008)
AT4G25740	GRF3	Ribosome/Ribosome, eukaryotes (ath03010)
AT4G25890	GRF3	Ribosome/Ribosome, eukaryotes (ath03010)
AT4G26230	GRF3	Ribosome/Ribosome, eukaryotes (ath03010)
AT4G26470	GRF1	Plant-pathogen interaction (ath04626)
AT4G26770	GRF1	Glycerophospholipid metabolism (ath00564)	Phosphatidylinositol signaling system (ath04070)
AT4G27440	GRF1	Porphyrin and chlorophyll metabolism (ath00860)
AT4G29820	GRF1	mRNA surveillance pathway (ath03015)
AT4G30800	GRF3	Ribosome/Ribosome, eukaryotes (ath03010)
AT4G30950	GRF1	Biosynthesis of unsaturated fatty acids (ath01040)
AT4G31120	GRF1	RNA transport (ath03013)
AT4G31700	GRF3	Ribosome/Ribosome, eukaryotes (ath03010)
AT4G32840	GRF3	Biosynthesis of amino acids (ath01230)	Carbon metabolism (ath01200)	Fructose and mannose metabolism (ath00051)	Galactose metabolism (ath00052)	Glycolysis (Embden-Meyerhof pathway), glucose => pyruvate (ath_M00001)	Glycolysis / Gluconeogenesis (ath00010)	Pentose phosphate pathway (ath00030)
AT4G33070	GRF1	Glycolysis / Gluconeogenesis (ath00010)
AT4G34050	GRF1	Capsaicin biosynthesis, L-Phenylalanine => Capsaicin (ath_M00350)	Capsaicin biosynthesis, L-Phenylalanine => Capsaicin (bdi_M00350)	Flavonoid biosynthesis (ath00941)	Flavonoid biosynthesis (bdi00941)	Phenylalanine metabolism (ath00360)	Phenylpropanoid biosynthesis (ath00940)	Phenylpropanoid biosynthesis (bdi00940)
AT4G34230	GRF1	Lignin biosynthesis, cinnamate => lignin (ath_M00039)	Phenylpropanoid biosynthesis (ath00940)
AT4G34555	GRF1+GRF3	Ribosome/Ribosome, eukaryotes (ath03010)
AT4G34750	GRF1	Plant hormone signal transduction (ath04075)
AT4G34760	GRF1	Plant hormone signal transduction (ath04075)
AT4G35850	GRF1	Ribosome/Ribosome, eukaryotes (ath03010)
AT4G36220	GRF1	Phenylpropanoid biosynthesis (ath00940)
AT4G37320	GRF1	Limonene and pinene degradation (ath00903)	Stilbenoid, diarylheptanoid and gingerol biosynthesis (ath00945)
AT4G37410	GRF3	Limonene and pinene degradation (ath00903)	Stilbenoid, diarylheptanoid and gingerol biosynthesis (ath00945)
AT4G37430	GRF3	Limonene and pinene degradation (ath00903)	Stilbenoid, diarylheptanoid and gingerol biosynthesis (ath00945)
AT4G37550	GRF1	Carbon metabolism (ath01200)	Glyoxylate and dicarboxylate metabolism (ath00630)	Nitrogen metabolism (ath00910)
AT4G37970	GRF1+GRF3	Lignin biosynthesis, cinnamate => lignin (ath_M00039)	Phenylpropanoid biosynthesis (ath00940)
AT4G39800	GRF1	Inositol phosphate metabolism (ath00562)
AT5G02610	GRF3	Ribosome/Ribosome, eukaryotes (ath03010)
AT5G03860	GRF1	Carbon metabolism (ath01200)	Glyoxylate and dicarboxylate metabolism (ath00630)	Glyoxylate cycle (ath_M00012)	Pyruvate metabolism (ath00620)
AT5G04120	GRF1	Biosynthesis of amino acids (ath01230)	Carbon metabolism (ath01200)	Glycine, serine and threonine metabolism (ath00260)	Glycolysis (Embden-Meyerhof pathway), glucose => pyruvate (ath_M00001)	Glycolysis / Gluconeogenesis (ath00010)	Glycolysis, core module involving three-carbon compounds (ath_M00002)
AT5G04590	GRF1	Sulfur metabolism (ath00920)
AT5G04970	GRF3	Pectin degradation (ath_M00081)	Pentose and glucuronate interconversions (ath00040)	Starch and sucrose metabolism (ath00500)
AT5G05440	GRF3	Plant hormone signal transduction (ath04075)
AT5G05680	GRF1	RNA transport (ath03013)
AT5G06110	GRF1	Inosine monophosphate biosynthesis, PRPP + glutamine => IMP (ath_M00048)
AT5G08170	GRF1	Arginine and proline metabolism (ath00330)
AT5G08640	GRF1+GRF3	Flavonoid biosynthesis (ath00941)
AT5G09300	GRF1	Leucine degradation, leucine => acetoacetate + acetyl-CoA (ath_M00036)	Valine, leucine and isoleucine degradation (ath00280)
AT5G10030	GRF1	Plant hormone signal transduction (ath04075)
AT5G11720	GRF1	Galactose metabolism (ath00052)	Starch and sucrose metabolism (ath00500)
AT5G12840	GRF1	Flowering Time Pathway (WP2312)
AT5G13110	GRF1	Carbon metabolism (ath01200)	Glutathione metabolism (ath00480)	Pentose phosphate pathway (ath00030)	Pentose phosphate pathway (Pentose phosphate cycle) (ath_M00004)	Pentose phosphate pathway, oxidative phase, glucose 6P => ribulose 5P (ath_M00006)
AT5G13510	GRF1	Ribosome/Ribosome, eukaryotes (ath03010)
AT5G13800	GRF1	chlorophyll a degradation II (ARA_PWY-6927)
AT5G14320	GRF1	Ribosome/Ribosome, eukaryotes (ath03010)
AT5G14580	GRF1	Purine metabolism (ath00230)	Pyrimidine metabolism (ath00240)	RNA degradation (ath03018)
AT5G14780	GRF1	Carbon metabolism (ath01200)	Glyoxylate and dicarboxylate metabolism (ath00630)
AT5G15180	GRF1	Lignin biosynthesis, cinnamate => lignin (ath_M00039)	Phenylalanine metabolism (ath00360)	Phenylpropanoid biosynthesis (ath00940)
AT5G15860	GRF1	Terpenoid backbone biosynthesis (ath00900)
AT5G16230	GRF3	Fatty acid biosynthesis (ath00061)
AT5G16570	GRF1	Alanine, aspartate and glutamate metabolism (ath00250)	Arginine and proline metabolism (ath00330)	Biosynthesis of amino acids (ath01230)	Glyoxylate and dicarboxylate metabolism (ath00630)	Nitrogen metabolism (ath00910)
AT5G16750	GRF1	Ribosome biogenesis in eukaryotes (ath03008)							Valine/isoleucine biosynthesis, pyruvate => valine / 2-oxobutanoate => isoleucine (ath_M00019)
AT5G20280	GRF1	Starch and sucrose metabolism (ath00500)
AT5G20410	GRF1	Glycerolipid metabolism (ath00561)
AT5G20950	GRF1+GRF3	Cyanoamino acid metabolism (ath00460)	Phenylpropanoid biosynthesis (ath00940)	Starch and sucrose metabolism (ath00500)
AT5G22300	GRF1+GRF3	Cyanoamino acid metabolism (ath00460)
AT5G22410	GRF1	Lignin biosynthesis, cinnamate => lignin ( ath_M00039)	Phenylalanine metabolism (ath00360)	Phenylpropanoid biosynthesis (ath00940)
AT5G22440	GRF1+GRF3	Ribosome/Ribosome, eukaryotes (ath03010)
AT5G22500	GRF1+GRF3	Cutin, suberine and wax biosynthesis (ath00073)	Peroxisome (ath04146)
AT5G22630	GRF1	Biosynthesis of amino acids (ath01230)	Phenylalanine, tyrosine and tryptophan biosynthesis (ath00400)
AT5G23010	GRF1	2-Oxocarboxylic acid metabolism (ath01210)	Glucosinolate biosynthesis (ath00966)
AT5G23080	GRF1	Spliceosome, 35S U5-snRNP (ath_M00355)
AT5G23300	GRF1+GRF3	Pyrimidine metabolism (ath00240)
AT5G23740	GRF1	Ribosome/Ribosome, eukaryotes (ath03010)
AT5G24760	GRF1	Degradation of aromatic compounds (ath01220)	Fatty acid degradation (ath00071)	Glycolysis / Gluconeogenesis (ath00010)	Tyrosine metabolism (ath00350)
AT5G25890	GRF1	Plant hormone signal transduction (ath04075)
AT5G26310	GRF1	Phenylpropanoid biosynthesis (ath00940)
AT5G35170	GRF1	Adenine ribonucleotide biosynthesis, IMP => ADP,ATP (ath_M00049)	Purine metabolism (ath00230)
AT5G36150	GRF1+GRF3	Sesquiterpenoid and triterpenoid biosynthesis (ath00909)
AT5G37600	GRF1	Alanine, aspartate and glutamate metabolism (ath00250)	Arginine and proline metabolism (ath00330)	Biosynthesis of amino acids (ath01230)	Glyoxylate and dicarboxylate metabolism ( ath00630)	Nitrogen metabolism (ath00910)	Seed Development (WP2280)
AT5G38710	GRF3	Arginine and proline metabolism (ath00330)	citrulline biosynthesis (ARA_CITRULBIO-PWY)	proline degradation (ARA_PROUT-PWY)
AT5G40490	GRF3	Spliceosome (ath03040)
AT5G41670	GRF1+GRF3	Carbon metabolism (ath01200)	Glutathione metabolism (ath00480)	Pentose phosphate pathway (ath00030)	Pentose phosphate pathway (Pentose phosphate cycle) (ath_M00004)	Pentose phosphate pathway, oxidative phase, glucose 6P => ribulose 5P (ath_M00006)
AT5G42380	GRF1	Plant-pathogen interaction (ath04626)
AT5G43380	GRF1	mRNA surveillance pathway (ath03015)
AT5G43710	GRF3	Protein processing in endoplasmic reticulum (ath04141)
AT5G47220	GRF1	Plant hormone signal transduction (ath04075)
AT5G47960	GRF1	Endocytosis (ath04144)
AT5G48430	GRF3	Seed Development (WP2280)
AT5G48930	GRF1	Flavonoid biosynthesis (ath00941)	Phenylpropanoid biosynthesis (ath00940)	Stilbenoid, diarylheptanoid and gingerol biosynthesis (ath00945)
AT5G49650	GRF1	Pentose and glucuronate interconversions (ath00040)
AT5G53460	GRF1	Alanine, aspartate and glutamate metabolism (ath00250)	Biosynthesis of amino acids (ath01230)	Nitrogen metabolism (ath00910)
AT5G54160	GRF1+GRF3	Flavone and flavonol biosynthesis (ath00944)
AT5G54270	GRF1	Flowering Time Pathway (WP2312)	Photosynthesis - antenna proteins (ath00196)
AT5G54600	GRF1	Ribosome/Ribosome, eukaryotes (ath03010)
AT5G56080	GRF3	nicotianamine biosynthesis (ARA_PWY-5957)	Seed Development (WP2280)
AT5G57220	GRF3	Limonene and pinene degradation (ath00903)	Stilbenoid, diarylheptanoid and gingerol biosynthesis (ath00945)
AT5G57660	GRF1	Flowering Time Pathway (WP2312)
AT5G57980	GRF3	Purine metabolism (ath00230)	Pyrimidine metabolism (ath00240)	RNA polymerase (ath03020)	RNA polymerase I, eukaryotes (ath_M00182)	RNA polymerase II, eukaryotes (ath_M00180)	RNA polymerase III, eukaryotes (ath_M00181)
AT5G58780	GRF1	Terpenoid backbone biosynthesis (ath00900)
AT5G58784	GRF3	Terpenoid backbone biosynthesis (ath00900)
AT5G60670	GRF3	Ribosome/Ribosome, eukaryotes (ath03010)							Reductive pentose phosphate cycle, glyceraldehyde-3P => ribulose-5P (ath_M00167)
AT5G62480	GRF1	Glutathione metabolism (ath00480)
AT5G62530	GRF1+GRF3	Alanine, aspartate and glutamate metabolism (ath00250)	Arginine and proline metabolism (ath00330)
AT5G63590	GRF3	Flavonoid biosynthesis (ath00941)
AT5G63990	GRF1	Inositol phosphate metabolism (ath00562)	Phosphatidylinositol signaling system (ath04070)	Sulfur metabolism (ath00920)
AT5G64120	GRF3	Lignin biosynthesis, cinnamate => lignin (ath_M00039)	Phenylalanine metabolism (ath00360)	Phenylpropanoid biosynthesis (ath00940)
AT5G64570	GRF1	Amino sugar and nucleotide sugar metabolism (ath00520)	Starch and sucrose metabolism (ath00500)
AT5G64860	GRF1	Seed Development (WP2280)	Starch and sucrose metabolism (ath00500)
AT5G65010	GRF1	Alanine, aspartate and glutamate metabolism (ath00250)
AT5G65210	GRF1	Plant hormone signal transduction (ath04075)
AT5G66540	GRF1	Ribosome biogenesis in eukaryotes (pyo03008)
AT5G66690	GRF3	Phenylpropanoid biosynthesis (ath00940)
AT5G67520	GRF1	Purine metabolism (ath00230)	Sulfur metabolism (ath00920)
AT3G50660	GRF1	Brassinosteroid biosynthesis (ath00905)	Castasterone biosynthesis, campesterol => castasterone (ath_M00371)
